# Supplementary material for: Hierarchical chiral MOFs with the induced chirality of AIE ligands exhibiting non-reciprocal CPL
Source: Royal Society of Chemistry journal article supplement (doi:10.1039/d4cc00925h), 2024-01-01
Supplement: d4cc00925h1.pdf [file d4cc00925h1.pdf]

## Supporting Information

### For

#### **Hierarchical Chiral MOFs with the Induced Chirality of AIE Ligands Exhibiting the Non-reciprocal CPL**

Hong-Ru Fu,<sup>a,c</sup> Dan-Dan Ren,<sup>a,b</sup> Kun Zhang,<sup>a,b</sup> Shuang Wang,<sup>a</sup> Xu-Jing Yang,<sup>a</sup> Qing-Rong Ding,<sup>c\*</sup> Ya-Pan Wu<sup>b\*</sup>

<sup>a</sup>College of Chemistry and Chemical Engineering, Luoyang Normal University, Luoyang 471934, P. R. China.

<sup>b</sup>College of Materials and Chemical Engineering, China Three Gorges University, Yichang 443002 China.

<sup>c</sup>State Key Laboratory of Structural Chemistry, Fujian Institute of Research on the Structure of Matter, Chinese Academy of Sciences, Fuzhou, Fujian, 350002, China.

\* Corresponding author E-mails: *qrding@fjirsm.ac.cn*, *wyapan2008@163.com*

## Material Characterization

All the chemicals were purchased commercially and used directly. UV-spectra analysis was carried out on Shimadzu UV-2600 spectrophotometer and Hitachi UH4150 spectrophotometer. Elemental analyses of C, H, and N were measured on a Perkin-Elmer 2400 elemental analyzer. Powder X-ray diffraction (PXRD) were performed on a Rigaku Dmax/2400 X-ray diffractometer operating at 40 kV and 100 mA, using Cu-K $\alpha$  radiation ( $\lambda = 1.5406 \text{ \AA}$ ). Thermogravimetric analysis (TGA) was carried out under nitrogen atmosphere on a Q600 SDY TGA-DTA-DSC thermal analyzer from room temperature to 700 °C with a heating rate of 5 °C/min. Quantum yields were tested on an Edinburgh Instruments FLS-980 spectrometer. Photoluminescence (PL) spectra were measured on a Hitachi F4500 luminescence spectrometer. CD spectra were recorded on a JASCO J-810. CPL spectra were measured on a JASCO CPL-300. The images of polarization are measured by upright fluorescence microscopy with 10 objective lens (Leica DM2500).

## Single-crystal X-ray crystallography

Single crystal X-ray analysis of DCF-15/LCF-15 and DCF-16/LCF-16 were performed on a Rigaku SuperNova detector using Mo K $\alpha$  radiation ( $\lambda = 0.71073 \text{ \AA}$ ) at 100 K. The structure of Cd-CBCD was solved with direct methods and refined by the full matrix least-squares on F<sup>2</sup> with SHELXL and Olex2 software. Anisotropic displacement parameters were applied to all non-hydrogen atoms. The hydrogen atoms were included and generated geometrically. The free solvent molecules in Cd-CBCD were highly disordered, and no satisfactory disorder model could be achieved. Thus, the PLATON/SQUEEZE routine was used to remove their diffraction contributions. CCDC-2265022, 2265023, 2245208 and 2245209 contains the supplementary crystallographic data for this paper. A summary of crystallographic data and structure-refinement parameters is given in Table S1 and S2.

**The synthesis of DCF-15 and LCF-15:** Cd(NO<sub>3</sub>)<sub>2</sub>·4H<sub>2</sub>O (60 mg, 0.20 mmol), D-cam (20 mg, 0.10 mmol), TPPE (25 mg 0.04 mmol), DMF (6 ml), n-Butanol (2 ml) and H<sub>2</sub>O (0.5 ml) were mixed in a 20 ml glass vial by ultrasonic agitation for 10 min and kept at 100 °C for five days. Colorless crystals were obtained with a yield of 70% (based on TPPE). Anal. Calcd (%): C, 57.60; H, 6.28; N, 8.02. Found (%): C, 57.56; H, 6.31; N, 8.04. LCF-15 was prepared by the similar process, only using L-cam to replace D-cam. The yields of DCF-15/LCF-15 were calculated to be 78.3% and 78.9% based on the amounts of TPPE ligands.

**The synthesis of DCF-16 and LCF-16:** Zn(NO<sub>3</sub>)<sub>2</sub>·6H<sub>2</sub>O (56 mg, 0.20 mmol), D-cam (20 mg, 0.10 mmol), TPA (25 mg, 0.1 mmol), DMF (3 ml) and DMSO (1 ml) were mixed in a 20 ml glass vial by ultrasonic agitation for 10 min and kept at 100 °C for three days. Colorless crystals were obtained with a yield of 65% (based on TPA). Anal. Calcd (%): C, 57.60; H, 6.28; N, 8.02. Found (%): C, 57.56; H, 6.31; N, 8.04. LCF-16 was prepared by the similar process, only using L-cam to replace D-cam. The yields of DCF-16/LCF-16 were calculated to be 66.7% and 67.1% based on the amounts of TPA ligands.

## The CD and CPL measurements of DCF-15/LCF-15 and DCF-16/LCF-16

CD spectra was measured on a JASCO J-1500 spectrophotometer. The samples were prepared by using the method for infrared measurement. A mixture of DCF-15/LCF-15 or DCF-16/LCF-16 and KBr (crystal/KBr 1:400, weight ratio, total weight of 100 mg) was finely ground and pressed into a transparent pellet with a diameter of 13 mm. The pellet was directly used for measurement

of CD. The wavelength and bandwidth of the monochromator were set to 280.0 and 1.0 nm, and the time-per-point of each sampling point was 0.5 s.

CPL spectra for all samples were recorded on a JASCO CPL-300 spectrophotometer in the solid state with scanning speed. The basic mode is used. Ex slit width, Em slit width, and accumulations of 100 nm min<sup>-1</sup>, 2000 um, 2000 um, and 2, respectively. The excitation wavelength was 360 nm and the DV values were about 0.5 V for DCF-15/LCF-15. As for DCF-16/LCF-16, expect that the excitation wavelength was 280 nm, the others are similar to that of DCF-15/LCF-15.

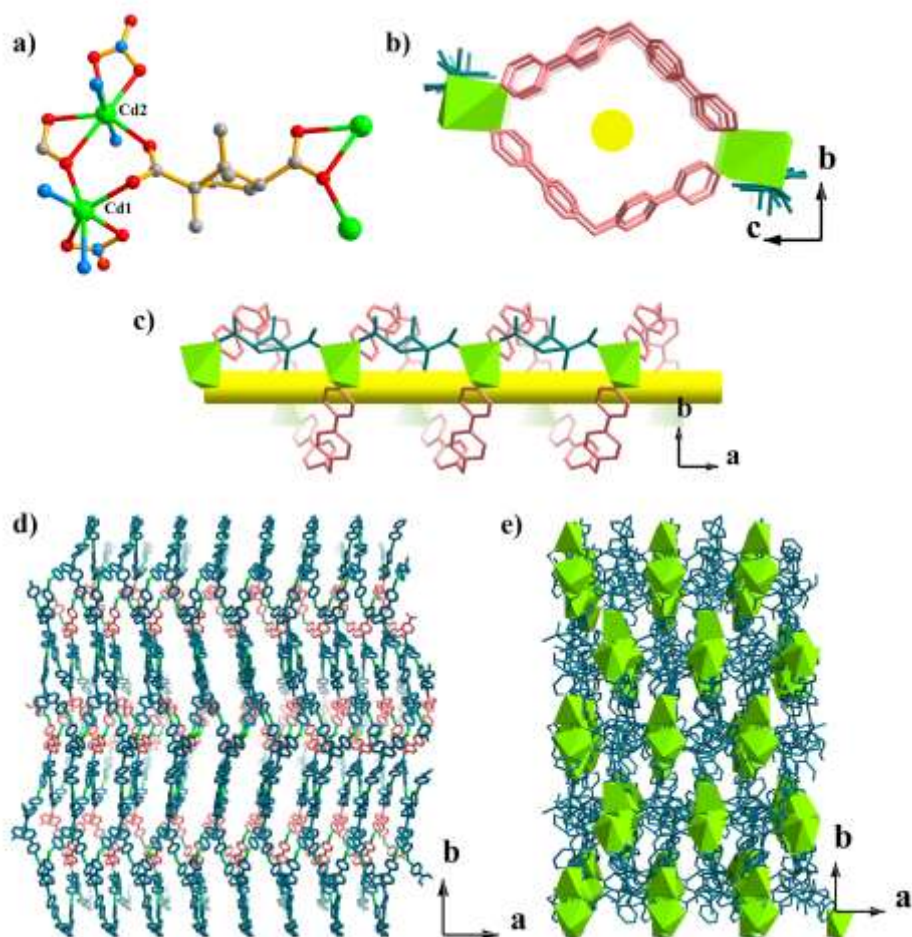

**Figure S1.** (a) The coordination model of D-cam; (b) the left-handed (*M*) helical chain assembled from Cd<sup>2+</sup> ions and TPPE in DCF-15 in the direction of a axis; (c) the left-handed (*M*) helical chain assembled from Cd<sup>2+</sup> ions and TPPE in DCF-15 in the direction of b axis; (d) the left-handed (*M*) helical chain assembled from Cd<sup>2+</sup> ions and TPPE in DCF-15 in the direction of c axis; (e) the 3D structure of DCF-15 in the direction of c axis.

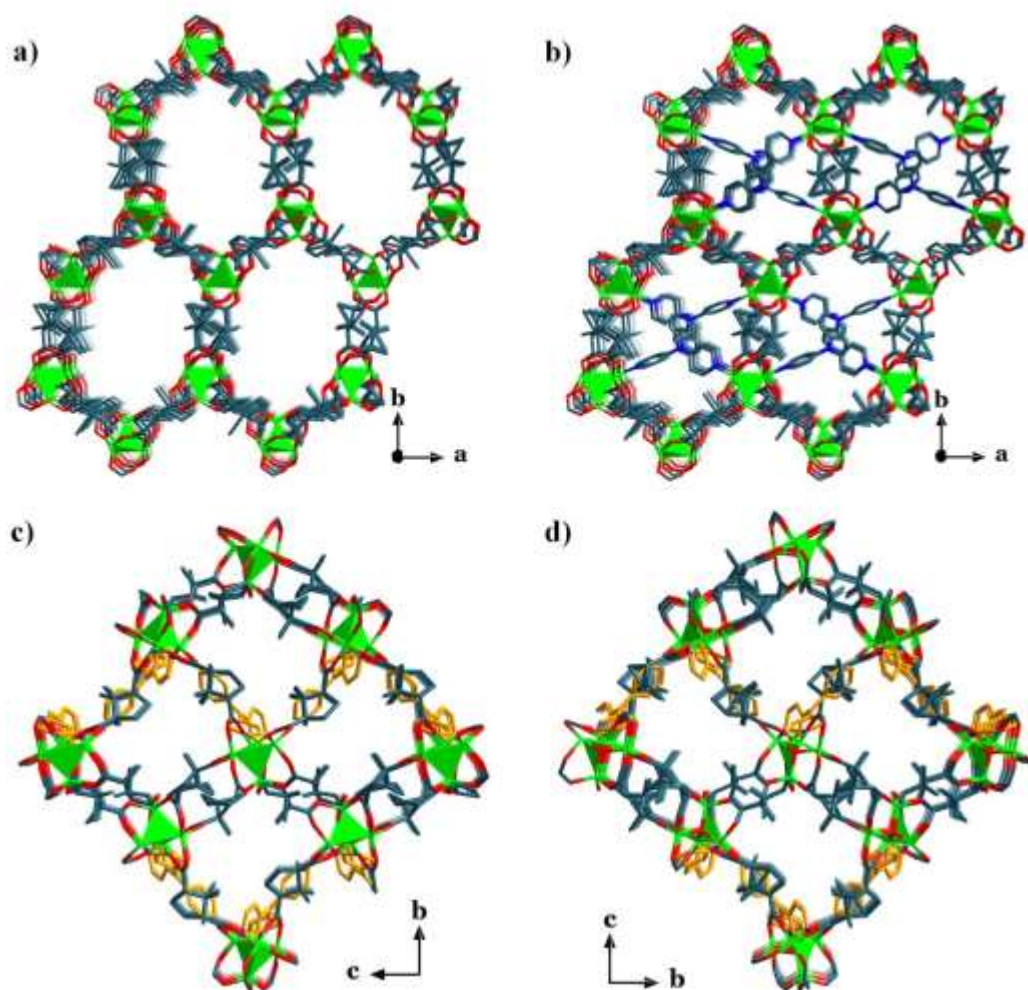

**Figure S2.** (a) The framework assembled of D-cam and  $\text{Zn}^{2+}$  ions in DCF-16 in the direction of c axis; (b) the final framework of DCF-16 in the direction of c axis; (c) the final framework of DCF-16 in the direction of a axis; (d) the final framework of LCF-16 in the direction of a axis.

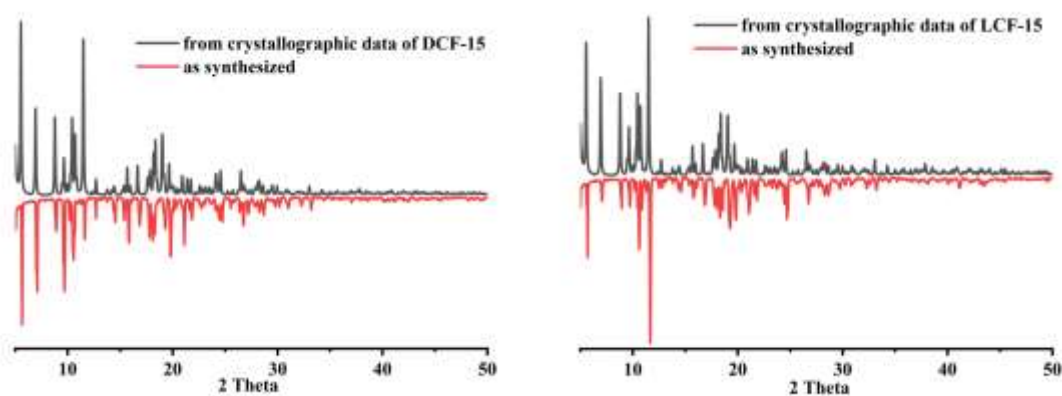

**Figure S3.** PXRD patterns of as-synthesized DCF-15 and LCF-15. All simulated patterns are calculated from the corresponding single-crystal structures. Test conditions: working voltage and current is 40 kV and 40 mA, respectively.

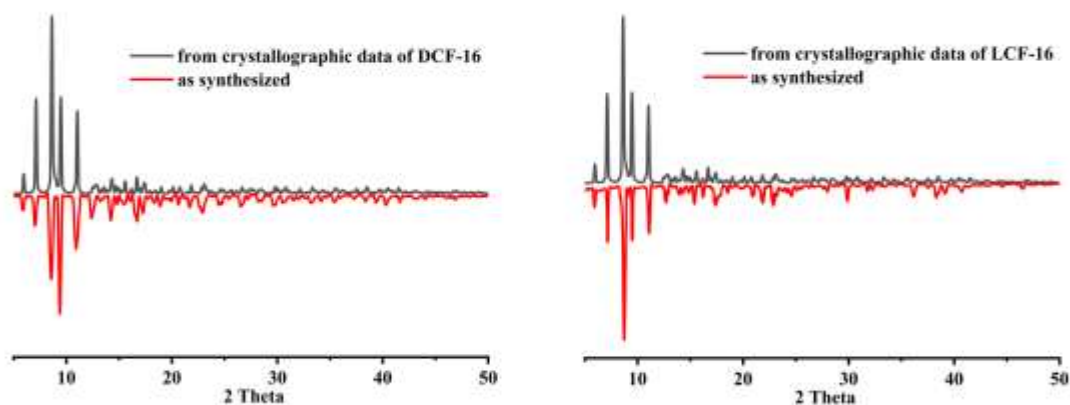

**Figure S4.** PXRD patterns of as-synthesized DCF-16 and LCF-16. All simulated patterns are calculated from the corresponding single-crystal structures. Test conditions: working voltage and current is 40 kV and 40 mA, respectively.

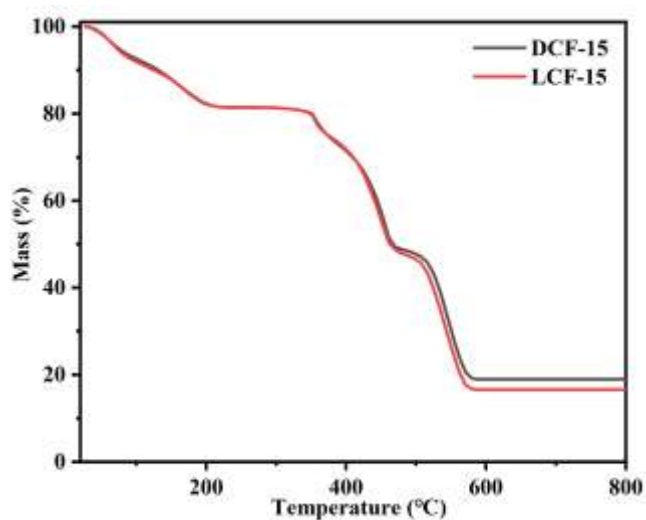

**Figure S5.** TG curves of DCF-15 and LCF-15 under air conditions.

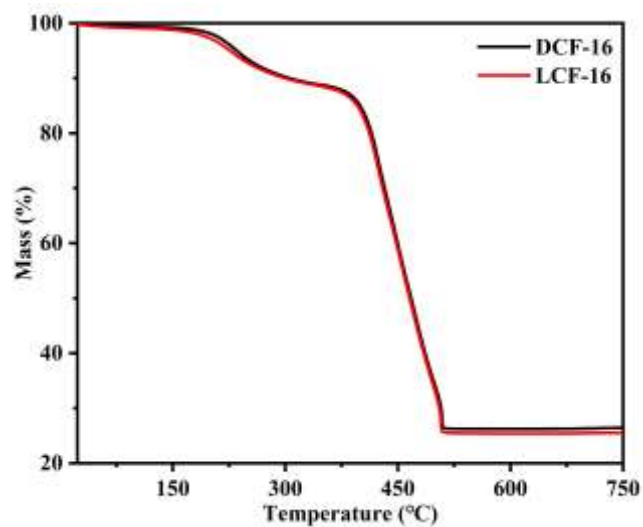

**Figure S6.** TG curves of DCF-16 and LCF-16 under air conditions.

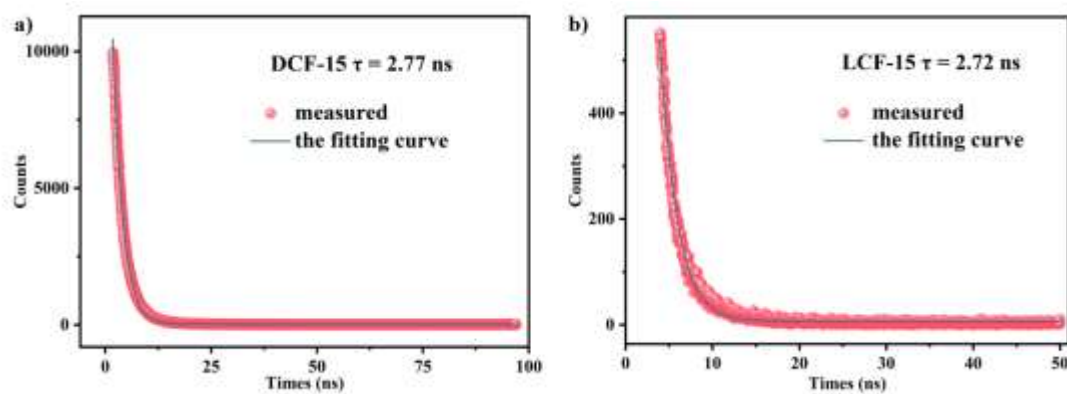

**Figure S7.** The fluorescent lifetimes of DCF-15 and LCF-15 at room conditions.

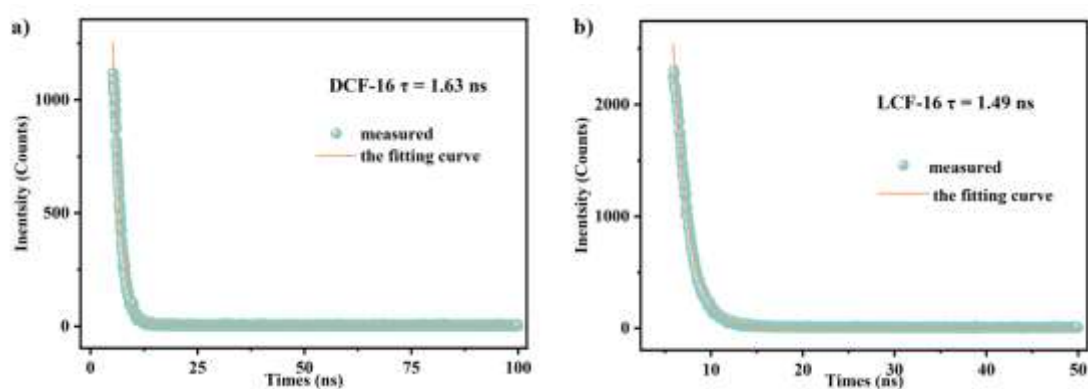

**Figure S8.** The fluorescent lifetimes of DCF-16 and LCF-16 at room conditions.

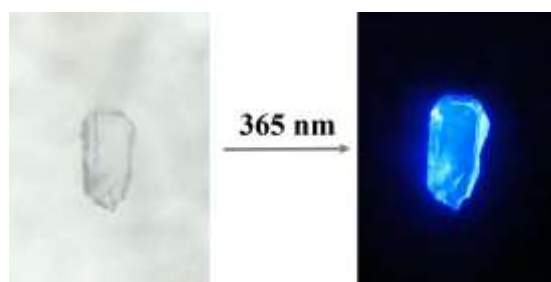

**Figure S9.** The photographs LCF-16 from fluorescence microscope.

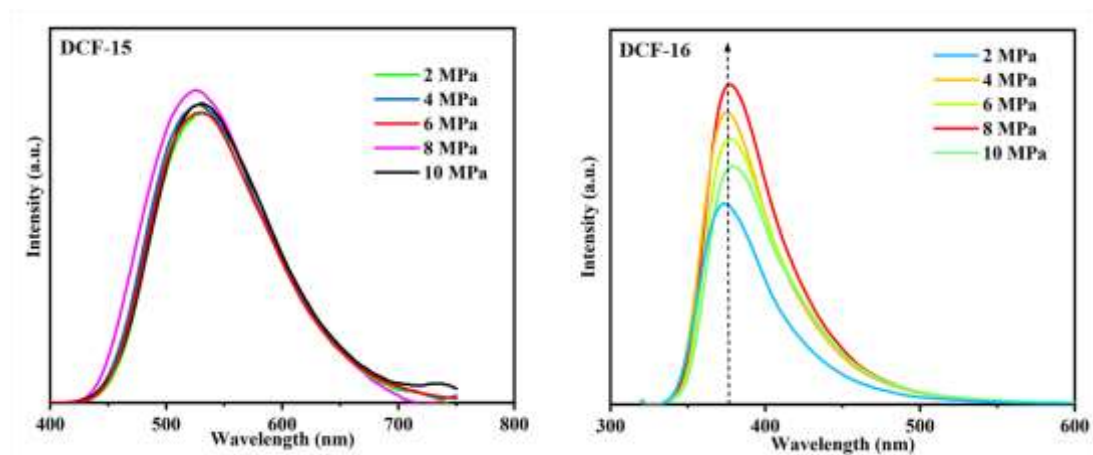

**Figure S10.** The emission behaviors of DCF-15 and DCF-16 under different pressure from 2 to 10 MPa. Using a similar method for the infrared measurement, the samples were prepared by adopting the KBr pellet.

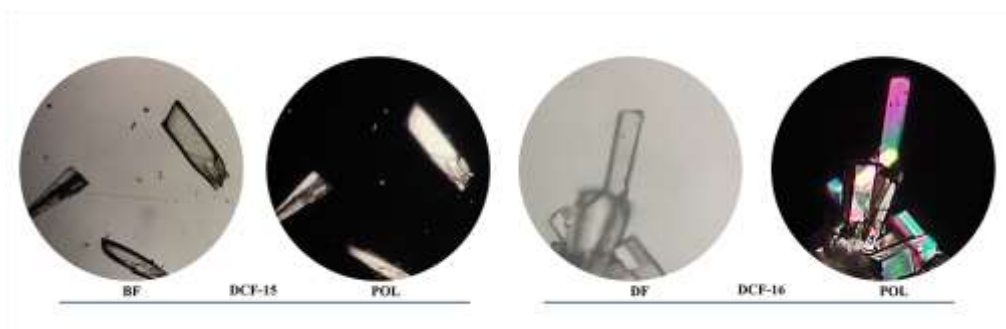

**Figure S11.** The photographs of DCF-15 and DCF-16 were obtained by upright fluorescence microscopy with 10 objective lens (Leica DM2500) under BF (bright field) and POL (polarization) mode, respectively.

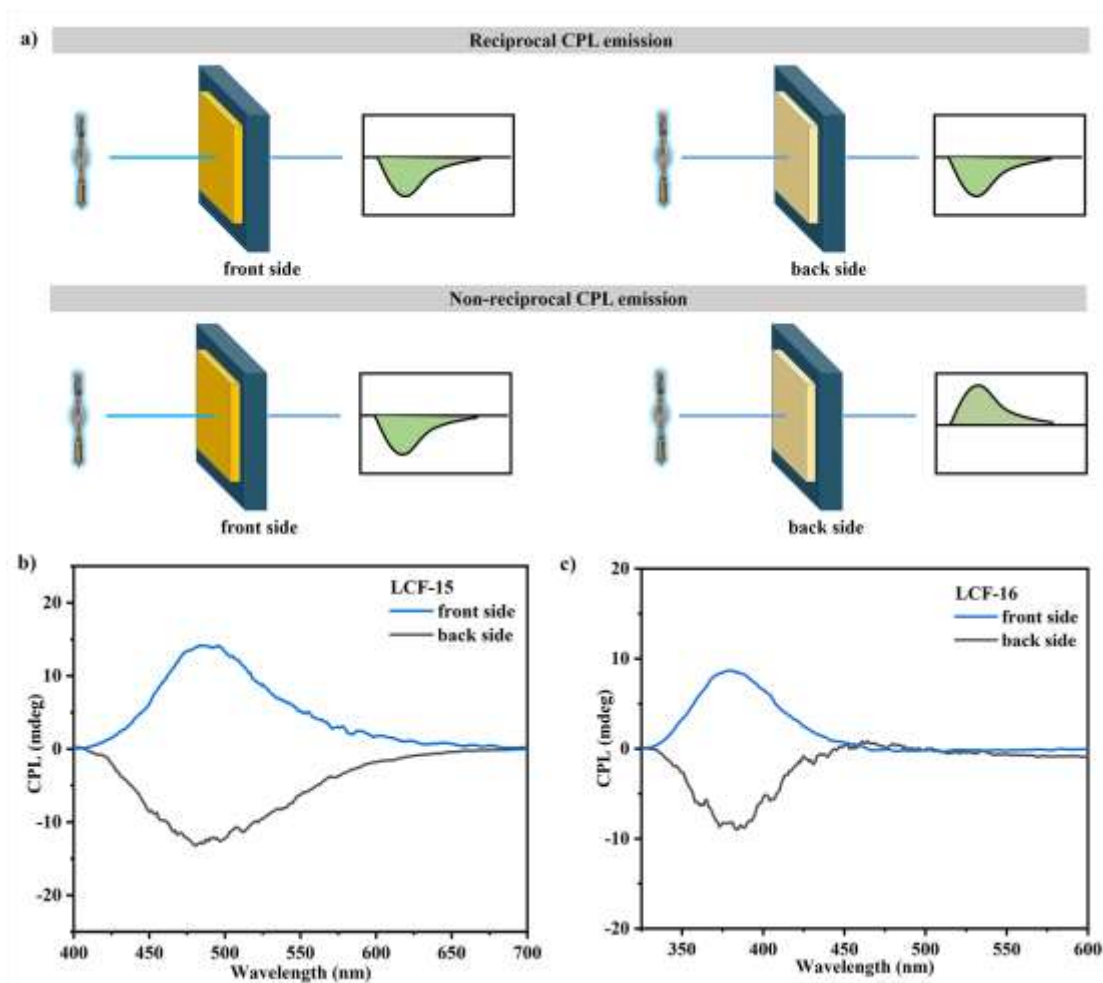

**Figure S12.** (a) Evaluation of reciprocal or non-reciprocal component of CP emission. (b,c) Non-reciprocal CPL of LCF-15 and LCF-16: CPL spectra for the front (blue line) and the back side (red line) of thin film sample.

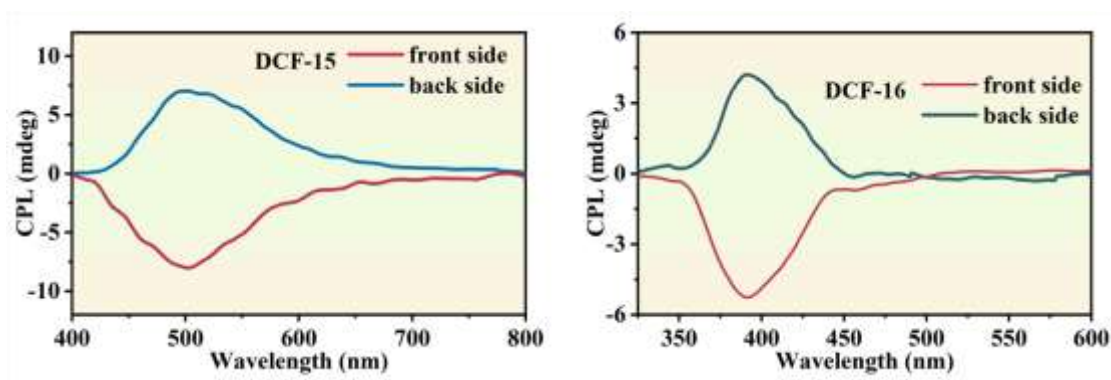

**Figure S13.** Non-reciprocal CPL of DCF-15 and DCF-16: CPL spectra for the front (blue line) and the back side (red line) of thin film sample.

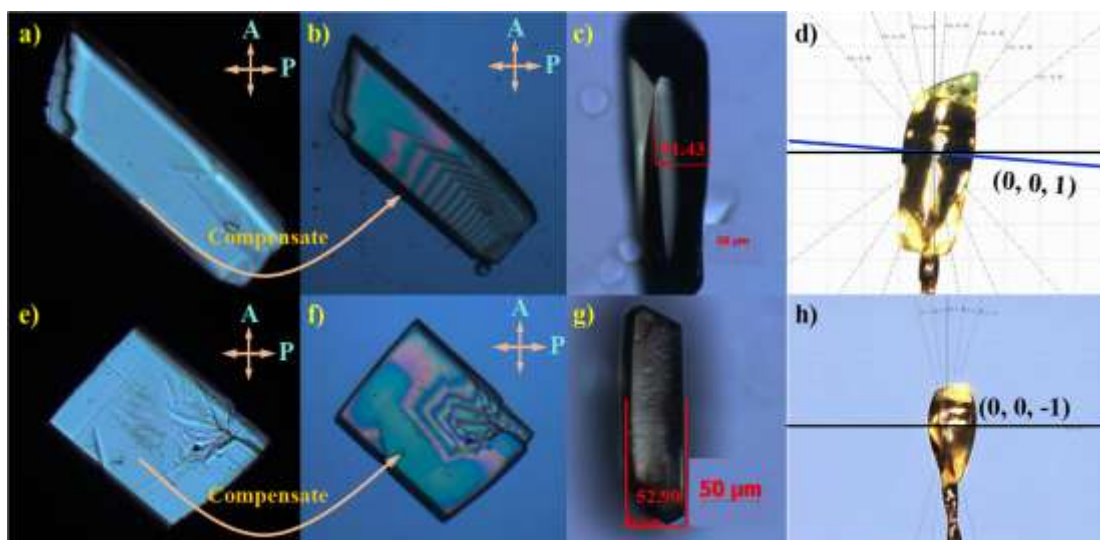

**Figure S14.** The optical properties under a polarizing microscopic, the thickness and the crystallization direction of DCF-15 and LCF-15. (a–d) DCF-15, (e–h) LCF-15.

The birefringence of DCF-15 and LCF-15 were investigated. As shown in Figure S14, in DCF-15 with a (001) crystal plane at a thickness of about 91.43  $\mu\text{m}$ , an optical path difference of 11350.96 nm was obtained, indicating a birefringence of 0.124. Similarly, the (00-1) crystal plane of LCF-15 with the thickness of about 52.90  $\mu\text{m}$  has a birefringence of 0.122.

The optical path difference and thickness were measured on a polarizing microscope (ZEISS Axio Scope. A1) equipped with a compensator.<sup>1</sup> The crystal face indices were ascertained using the single crystal orientation method on the above single crystal diffractometer.<sup>2</sup>

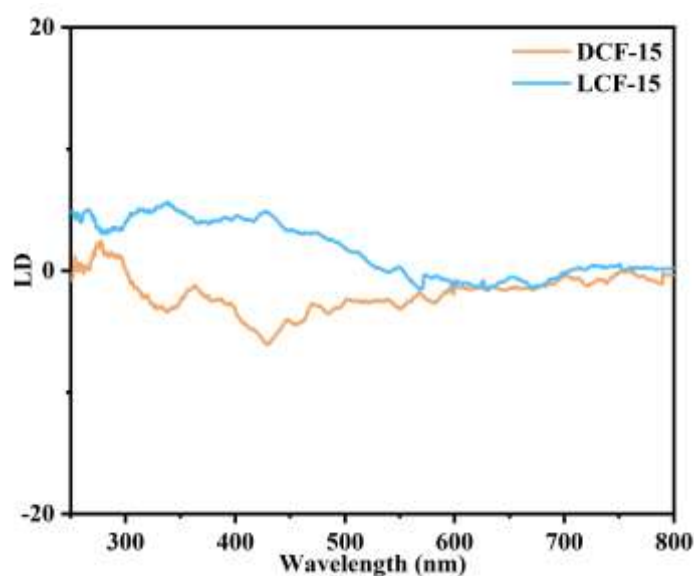

**Figure S15.** LD spectra of DCF-15/LCF-15.

**Table S1.** The crystallographic parameters of DCF-15 and LCF-15

| Identification code                                                                                                                                                                                                                                                                                                                                              | DCF-15                                                                         | LCF-15                                                                         |
|------------------------------------------------------------------------------------------------------------------------------------------------------------------------------------------------------------------------------------------------------------------------------------------------------------------------------------------------------------------|--------------------------------------------------------------------------------|--------------------------------------------------------------------------------|
| Number of CCDC                                                                                                                                                                                                                                                                                                                                                   | 2245209                                                                        | 2245208                                                                        |
| Empirical formula                                                                                                                                                                                                                                                                                                                                                | C <sub>55</sub> H <sub>42</sub> N <sub>6</sub> O <sub>10</sub> Cd <sub>2</sub> | C <sub>56</sub> H <sub>46</sub> N <sub>6</sub> O <sub>10</sub> Cd <sub>2</sub> |
| Formula weight                                                                                                                                                                                                                                                                                                                                                   | 1171.74                                                                        | 1187.79                                                                        |
| Temperature/K                                                                                                                                                                                                                                                                                                                                                    | 293                                                                            | 293                                                                            |
| Crystal system                                                                                                                                                                                                                                                                                                                                                   | orthorhombic                                                                   | orthorhombic                                                                   |
| Space group                                                                                                                                                                                                                                                                                                                                                      | <i>P</i> 2 <sub>1</sub> 2 <sub>1</sub> 2 <sub>1</sub>                          | <i>P</i> 2 <sub>1</sub> 2 <sub>1</sub> 2 <sub>1</sub>                          |
| <i>a</i> / Å                                                                                                                                                                                                                                                                                                                                                     | 9.6554(2)                                                                      | 9.6443(3)                                                                      |
| <i>b</i> / Å                                                                                                                                                                                                                                                                                                                                                     | 17.7129(4)                                                                     | 17.6700(6)                                                                     |
| <i>c</i> / Å                                                                                                                                                                                                                                                                                                                                                     | 36.6589(6)                                                                     | 36.6530(10)                                                                    |
| $\alpha$ / °                                                                                                                                                                                                                                                                                                                                                     | 90                                                                             | 90                                                                             |
| $\beta$ / °                                                                                                                                                                                                                                                                                                                                                      | 90                                                                             | 90                                                                             |
| $\gamma$ / °                                                                                                                                                                                                                                                                                                                                                     | 90                                                                             | 90                                                                             |
| Volume/ Å <sup>3</sup>                                                                                                                                                                                                                                                                                                                                           | 6269.6(2)                                                                      | 6246.2(3)                                                                      |
| <i>Z</i>                                                                                                                                                                                                                                                                                                                                                         | 4                                                                              | 4                                                                              |
| $\rho_{\text{calc}}/\text{cm}^3$                                                                                                                                                                                                                                                                                                                                 | 1.241                                                                          | 1.263                                                                          |
| $\mu$ / mm <sup>-1</sup>                                                                                                                                                                                                                                                                                                                                         | 0.731                                                                          | 0.735                                                                          |
| <i>F</i> (000)                                                                                                                                                                                                                                                                                                                                                   | 2360                                                                           | 2400                                                                           |
| Crystal size/ mm <sup>3</sup>                                                                                                                                                                                                                                                                                                                                    | 0.10 × 0.20 × 0.30                                                             | 0.16 × 0.16 × 0.20                                                             |
| Radiation                                                                                                                                                                                                                                                                                                                                                        | MoK $\alpha$ ( $\lambda$ = 0.71073)                                            | MoK $\alpha$ ( $\lambda$ = 0.71073)                                            |
| 2 $\theta$ range for data collection/°                                                                                                                                                                                                                                                                                                                           | 6.668 to 58.928                                                                | 6.646 to 58.504                                                                |
| Index ranges                                                                                                                                                                                                                                                                                                                                                     | -8 ≤ <i>h</i> ≤ 13, -21 ≤ <i>k</i> ≤ 22, -48 ≤ <i>l</i> ≤ 32                   | -13 ≤ <i>h</i> ≤ 10, -17 ≤ <i>k</i> ≤ 23, -24 ≤ <i>l</i> ≤ 49                  |
| Reflections collected                                                                                                                                                                                                                                                                                                                                            | 22080                                                                          | 20715                                                                          |
| Independent reflections                                                                                                                                                                                                                                                                                                                                          | 12971 [ <i>R</i> <sub>int</sub> = 0.0411, <i>R</i> <sub>sigma</sub> = 0.0781]  | 13045 [ <i>R</i> <sub>int</sub> = 0.0385, <i>R</i> <sub>sigma</sub> = 0.0852]  |
| Goodness-of-fit on <i>F</i> <sup>2</sup>                                                                                                                                                                                                                                                                                                                         | 1.041                                                                          | 1.096                                                                          |
| <i>Flack</i>                                                                                                                                                                                                                                                                                                                                                     | -0.04(2)                                                                       | -0.050(17)                                                                     |
| <i>R</i> <sub>1</sub> [ <i>I</i> > 2 $\sigma$ ( <i>I</i> )]                                                                                                                                                                                                                                                                                                      | <i>R</i> <sub>1</sub> = 0.0728, <i>wR</i> <sub>2</sub> = 0.2034                | <i>R</i> <sub>1</sub> = 0.0725, <i>wR</i> <sub>2</sub> = 0.2030                |
| <i>wR</i> <sub>2</sub> (all data)                                                                                                                                                                                                                                                                                                                                | <i>R</i> <sub>1</sub> = 0.0913, <i>wR</i> <sub>2</sub> = 0.2291                | <i>R</i> <sub>1</sub> = 0.0912, <i>wR</i> <sub>2</sub> = 0.2237                |
| $R = \frac{\sum   F_o  -  F_c  }{\sum  F_o }, \quad wR = \frac{\{\sum [w( F_o ^2 -  F_c ^2)^2] / \sum [w( F_o ^4)]\}^{1/2}, \quad w = 1 / [\sigma^2(F_o^2) + (0.1391P)^2 + 0.3555P] \text{ where } P = (F_o^2 + 2F_c^2) / 3 \text{ for DCF-15.}$ $W = 1 / [\sigma^2(F_o^2) + (0.1212P)^2 + 0.7181P] \text{ where } P = (F_o^2 + 2F_c^2) / 3 \text{ for LCF-15.}$ |                                                                                |                                                                                |

**Table S2. The crystallographic parameters of DCF-16 and LCF-16**

| Identification code                                                                                                                                                                                                                                                                                                                                        | DCF-16                                                                           | LCF-16                                                                           |
|------------------------------------------------------------------------------------------------------------------------------------------------------------------------------------------------------------------------------------------------------------------------------------------------------------------------------------------------------------|----------------------------------------------------------------------------------|----------------------------------------------------------------------------------|
| Number of CCDC                                                                                                                                                                                                                                                                                                                                             | 2265022                                                                          | 2265023                                                                          |
| Empirical formula                                                                                                                                                                                                                                                                                                                                          | C <sub>45</sub> H <sub>39</sub> N <sub>4</sub> O <sub>13</sub> Zn <sub>4</sub>   | C <sub>45</sub> H <sub>43</sub> N <sub>4</sub> O <sub>13</sub> Zn <sub>4</sub>   |
| Formula weight                                                                                                                                                                                                                                                                                                                                             | 1105.36                                                                          | 1100.24                                                                          |
| Temperature/K                                                                                                                                                                                                                                                                                                                                              | 293                                                                              | 293                                                                              |
| Crystal system                                                                                                                                                                                                                                                                                                                                             | orthorhombic                                                                     | orthorhombic                                                                     |
| Space group                                                                                                                                                                                                                                                                                                                                                | <i>P</i> 2 <sub>1</sub> 2 <sub>1</sub> 2 <sub>1</sub>                            | <i>P</i> 2 <sub>1</sub> 2 <sub>1</sub> 2 <sub>1</sub>                            |
| <i>a</i> / Å                                                                                                                                                                                                                                                                                                                                               | 13.6565(3)                                                                       | 13.6827(4)                                                                       |
| <i>b</i> / Å                                                                                                                                                                                                                                                                                                                                               | 14.1762(4)                                                                       | 14.1989(7)                                                                       |
| <i>c</i> / Å                                                                                                                                                                                                                                                                                                                                               | 29.6834(9)                                                                       | 29.7700(14)                                                                      |
| $\alpha$ / °                                                                                                                                                                                                                                                                                                                                               | 90                                                                               | 90                                                                               |
| $\beta$ / °                                                                                                                                                                                                                                                                                                                                                | 90                                                                               | 90                                                                               |
| $\gamma$ / °                                                                                                                                                                                                                                                                                                                                               | 90                                                                               | 90                                                                               |
| Volume/ Å <sup>3</sup>                                                                                                                                                                                                                                                                                                                                     | 5746.6(3)                                                                        | 5783.7(4)                                                                        |
| <i>Z</i>                                                                                                                                                                                                                                                                                                                                                   | 4                                                                                | 4                                                                                |
| $\rho_{\text{calc}}/\text{cm}^3$                                                                                                                                                                                                                                                                                                                           | 1.263                                                                            | 1.264                                                                            |
| $\mu$ / mm <sup>-1</sup>                                                                                                                                                                                                                                                                                                                                   | 1.704                                                                            | 1.693                                                                            |
| <i>F</i> (000)                                                                                                                                                                                                                                                                                                                                             | 2305                                                                             | 2224                                                                             |
| Crystal size/ mm <sup>3</sup>                                                                                                                                                                                                                                                                                                                              | 0.12 × 0.13 × 0.17                                                               | 0.12 × 0.13 × 0.19                                                               |
| Radiation                                                                                                                                                                                                                                                                                                                                                  | MoK $\alpha$ ( $\lambda$ = 0.71073)                                              | MoK $\alpha$ ( $\lambda$ = 0.71073)                                              |
| 2 $\theta$ range for data collection/°                                                                                                                                                                                                                                                                                                                     | 6.62 to 58.498                                                                   | 6.752 to 58.380                                                                  |
| Index ranges                                                                                                                                                                                                                                                                                                                                               | -11 ≤ <i>h</i> ≤ 18, -38 ≤ <i>k</i> ≤ 19,<br>-19 ≤ <i>l</i> ≤ 12                 | -11 ≤ <i>h</i> ≤ 18, -19 ≤ <i>k</i> ≤ 12,<br>-38 ≤ <i>l</i> ≤ 40                 |
| Reflections collected                                                                                                                                                                                                                                                                                                                                      | 19296                                                                            | 22617                                                                            |
| Independent reflections                                                                                                                                                                                                                                                                                                                                    | 10496 [ <i>R</i> <sub>int</sub> = 0.0296, <i>R</i> <sub>sigma</sub> =<br>0.0546] | 12140 [ <i>R</i> <sub>int</sub> = 0.0344, <i>R</i> <sub>sigma</sub> =<br>0.0637] |
| Goodness-of-fit on <i>F</i> <sup>2</sup>                                                                                                                                                                                                                                                                                                                   | 1.027                                                                            | 1.032                                                                            |
| <i>Flc</i> <sub>ak</sub>                                                                                                                                                                                                                                                                                                                                   | 0.017(7)                                                                         | 0.017(8)                                                                         |
| <i>R</i> <sub>1</sub> [ <i>I</i> > 2 $\sigma$ ( <i>I</i> )]                                                                                                                                                                                                                                                                                                | <i>R</i> <sub>1</sub> = 0.0532, <i>wR</i> <sub>2</sub> = 0.1473                  | <i>R</i> <sub>1</sub> = 0.0527, <i>wR</i> <sub>2</sub> = 0.1325                  |
| <i>wR</i> <sub>2</sub> (all data)                                                                                                                                                                                                                                                                                                                          | <i>R</i> <sub>1</sub> = 0.0662, <i>wR</i> <sub>2</sub> = 0.1565                  | <i>R</i> <sub>1</sub> = 0.0663, <i>wR</i> <sub>2</sub> = 0.1413                  |
| $R = \frac{\sum   F_o  -  F_c  }{\sum  F_o }, \quad wR = \frac{\{\sum [w( F_o ^2 -  F_c ^2)^2] / \sum [w( F_o ^4)]\}^{1/2}, \quad w =$ $1/[\sigma^2(F_o^2) + (0.0982P)^2 + 1.9486P] \text{ where } P = (F_o^2 + 2F_c^2)/3 \text{ for DCF-16.}$ $w = 1/[\sigma^2(F_o^2) + (0.0766P)^2 + 2.2395P] \text{ where } P = (F_o^2 + 2F_c^2)/3 \text{ for LCF-16.}$ |                                                                                  |                                                                                  |

**REFERENCES**

1. H. Sha, R. Su, Z. Xiong, Z. Wang, P. Shan, C. He, X. Yang, X. Long, Adv. Optical Mater. 2021, 9, 2100080.
2. X. Xu, F. Wang, W. Xu, H. Lu, L. Lv, H. Sha, X. Jiang, S. Wu, S. Wang, Adv. Sci. 2023, 10, 2206833.
